# Supplementary material
Source: PubMed Central journal article supplement (PMC3731417)
Supplement: NIHMS455049-supplement-1_si_001.pdf [file NIHMS455049-supplement-1_si_001.pdf]

*Supporting Information*

## New GABA/Glutamate Receptor Target for [<sup>3</sup>H]Isoxazoline Insecticide

Pablo García-Reynaga, Chunqin Zhao, John E. Casida\* and Richmond Sarpong\*

*Department of Chemistry, University of California, Berkeley, California 94720*

*Department of Environmental Science, Policy and Management,*

*University of California, Berkeley, California 94720*

\*e-mail: [rsarpong@berkeley.edu](mailto:rsarpong@berkeley.edu) and [ectl@berkeley.edu](mailto:ectl@berkeley.edu)

### Table of Contents:

|                              |    |
|------------------------------|----|
| General Methods .....        | S1 |
| Experimental Procedures..... | S2 |
| References.....              | S3 |
| Spectral Data.....           | S4 |

**General Methods.** All reactions were performed in flame-dried glassware fitted with rubber septa under a nitrogen atmosphere unless otherwise specified. Liquid reagents and solvents were transferred via syringe under nitrogen. Tetrahydrofuran (THF), diethyl ether and toluene were dried over alumina under a nitrogen atmosphere in a GlassContour solvent system. Dichloromethane (CH<sub>2</sub>Cl<sub>2</sub>) was distilled over calcium hydride. All other solvents and reagents were used as received unless otherwise noted. Reaction temperatures above 23 °C were controlled by an IKA<sup>®</sup> temperature modulator. Reactions were monitored by thin layer chromatography using SiliCycle silica gel 60 F254 precoated plates (0.25 mm) which were visualized using UV light, *p*-anisaldehyde stain, KMnO<sub>4</sub> or CAM stain. Sorbent silica gel (particle size 40-63 μm) was used for flash chromatography. <sup>1</sup>H and <sup>13</sup>C NMR were recorded on Bruker AVB-400, AV-500, or AV-600 MHz spectrometers with <sup>13</sup>C operating frequencies of 100, 125, and 150 MHz, respectively, in CDCl<sub>3</sub> or C<sub>6</sub>D<sub>6</sub> at 23 °C. Chemical shifts (δ) are reported in ppm relative to the residual solvent signal (CDCl<sub>3</sub> δ = 7.27 for <sup>1</sup>H NMR and δ = 77.2 for <sup>13</sup>C NMR). Data for <sup>1</sup>H NMR are reported as follows: chemical shift (multiplicity, coupling constant, number of hydrogens). Multiplicity is abbreviated as follows: s (singlet), d (doublet), t (triplet), q (quartet), m (multiplet), br (broad). Mass spectral data were obtained from the Mass Spectral Facility at the University of California, Berkeley. HPLC analysis of [<sup>3</sup>H]A1443 was performed using a Prevail C18 column (5 μm, 4.6 x 150 mm) with mobile phase A (0.05% trifluoroacetic acid in water) and mobile phase B (acetonitrile) at a flow rate of 1.0 mL/min and a gradient of t=0 min 50% B, 10 min 90% B, 12 min 60% B. Under these conditions, the retention time of [<sup>3</sup>H]A1443 was 7.362 min.

**Starting Materials.** Commercially available starting materials were used as received. Boc-Gly-OH, *N,N'*-dicyclohexylcarbodiimide, 4-dimethylaminopyridine and thionyl chloride were purchased from Aldrich. Trifluoroethylamine was purchased from Matrix Scientific. Carboxylic acid **2** was prepared following the patented procedure.<sup>1</sup>

## Experimental Procedures

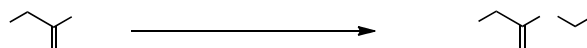

**Boc-Gly-NHCH<sub>2</sub>CF<sub>3</sub> (1).** *N,N'*-Dicyclohexylcarbodiimide (708 mg, 3.43 mmol) was added in one portion to a 0 °C stirring solution of *N*-Boc-Gly-OH (500 mg, 2.85 mmol) and 4-dimethylaminopyridine (34.8 mg, 285 μmol). After stirring the resulting reaction mixture at 0 °C for 5 min, trifluoroethylamine (269 μL, 3.43 mmol) was added and the reaction mixture stirred at room temperature. After 8 h, the reaction mixture was filtered through a short pad of Celite™ and the filtrate was concentrated *in vacuo*. Purification of the resulting residue by flash chromatography (20% EtOAc/Hex), using 30 mL silica gel, afforded dipeptide **1** (535 mg, 2.09 mmol, 73%) as a colorless solid. <sup>1</sup>H NMR (500 MHz, CDCl<sub>3</sub>) δ 6.69 (s, 1H), 5.12 (s, 1H), 3.93 (m, 2H), 3.85 (d, *J* = 5.92 Hz, 1H), 1.47 (s, 9H); <sup>13</sup>C NMR (150 MHz, CDCl<sub>3</sub>) δ 170.3, 156.6, 124.2 (q, *J* = 278 Hz), 80.9, 44.5, 40.7 (q, *J* = 34.91 Hz), 28.4; HRMS-ESI calcd for C<sub>9</sub>H<sub>15</sub>N<sub>2</sub>O<sub>3</sub>F<sub>3</sub>Na ([M+Na]<sup>+</sup>): 279.0927, found 279.0924.

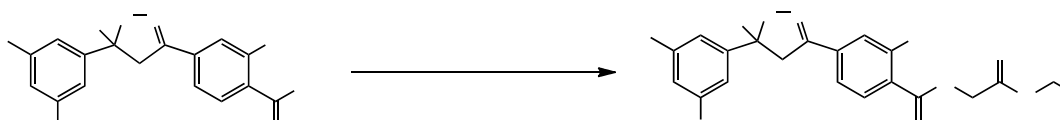

**A1443.** Isoxazoline A1443 was prepared following the procedure reported in a patent.<sup>2</sup> <sup>1</sup>H NMR (500 MHz, CDCl<sub>3</sub>) δ 7.58-7.41 (m, 6H), 6.92-6.85 (m, 1H), 6.74-6.68 (m, 1H), 4.21 (d, *J* = 5.33 Hz, 2H), 4.09 (d, *J* = 17.2 Hz, 1H), 4.01-3.91 (m, 2H), 3.71 (d, *J* = 17.2 Hz, 1H), 2.48 (s, 3H); <sup>13</sup>C NMR (150 MHz, CDCl<sub>3</sub>) δ 170.0, 169.6, 155.6, 139.0, 137.6, 137.3, 135.8, 108.09, 125.5, 124.5, 124.0 (q, *J* = 278 Hz), 130.0, 129.7, 128.1, 127.8, 128.0, 127.9, 87.5 (q, *J* = 30.6 Hz), 67.9, 43.9 (d, *J* = 47.4 Hz), 40.9 (q, *J* = 34.9 Hz), 19.9; HRMS-ESI calcd for C<sub>22</sub>H<sub>18</sub>N<sub>3</sub>O<sub>3</sub>Cl<sub>2</sub>F<sub>6</sub> ([M+H]<sup>+</sup>): 556.0624, found 556.0620.

**BocHN**

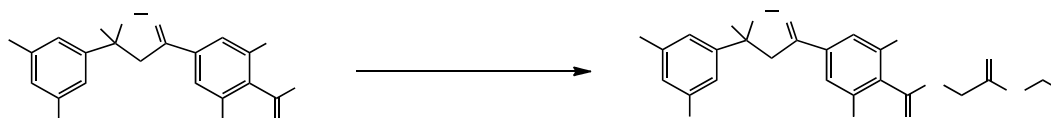

**Iodo-A1443 (4).** *N,N*-Diisopropylethylamine was added dropwise to a 0 °C stirring solution of iodocarboxylic acid **3**<sup>3</sup> (20 mg, 36.8 μmol), 1-ethyl-3-(3-dimethylaminopropyl)carbodiimide (EDCI, 8.47 mg, 44.2 μmol) and *N,N*-dimethylaminopyridine (450 μg, 6.68 μmol) in 368 μL CH<sub>2</sub>Cl<sub>2</sub>. The reaction mixture was then stirred at room temperature for 8 h, at which point it was diluted with EtOAc (50 mL)

and washed with 0.1 M aq. HCl (2x40 mL), water (1x40 mL) and brine (1x40 mL). The organic layer was separated, dried with anhydrous Na<sub>2</sub>SO<sub>4</sub> and concentrated *in vacuo*. Purification of the resulting residue by flash chromatography (50% to 80% EtOAc/Hex), using 10 mL silica gel, afforded iodo-A1443 (**4**) (17.9 mg, 26.2 μmol, 71%) as an orange oil. <sup>1</sup>H NMR (600 MHz, CDCl<sub>3</sub>) δ 7.91 (s, 1H), 7.60-7.39 (m, 4H), 6.77-6.66 (m, 1H), 6.46-6.37 (m, 1H), 4.21 (d, *J* = 5.44 Hz, 2H), 4.05 (d, *J* = 17.25 Hz, 1H), 4.02-3.94 (m, 2H), 3.67 (d, *J* = 17.2 Hz, 1H), 2.40 (s, 3H); <sup>13</sup>C NMR (150 MHz, CDCl<sub>3</sub>) δ 169.9, 168.7, 154.4, 144.0, 138.8, 137.6, 135.8, 134.8, 130.2, 130.0, 128.5, 125.4, 124.0 (q, *J* = 278 Hz), 93.1, 87.6, 43.7 (d, *J* = 16.1 Hz), 40.9 (m), 20.1; HRMS-ESI calcd for C<sub>22</sub>H<sub>17</sub>N<sub>3</sub>O<sub>3</sub>Cl<sub>2</sub>F<sub>6</sub>I ([M+Na]<sup>+</sup>): 681.9590, found 681.9584.

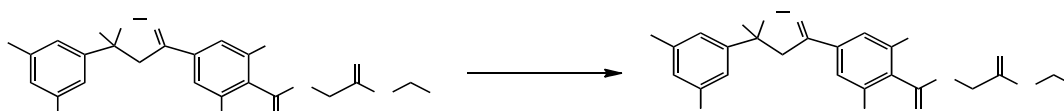

**A1443 and <sup>3</sup>H-A1443 by hydrogenolysis of iodo-A1443 (**4**).** A 4 mL vial was charged with iodo-A1443 (**4**) (1 mg, 1.47 μmol), 10% Pd/C (ca. 0.1-0.3 mg, Aldrich) and 95% EtOH (100 μL). The vial was fitted with a septum, purged with N<sub>2</sub> (3x) and then with H<sub>2</sub> (balloon, atmospheric pressure, 3x). The resulting reaction mixture was stirred at room temperature for 2 h. The reaction mixture was then filtered through a short pad of Celite<sup>TM</sup> and rinsed with EtOAc (3 mL). Concentration of the filtrate *in vacuo* afforded crude A1443 (1.0 mg) as a pale yellow oil. Analysis of this crude material by <sup>1</sup>H NMR and LCMS revealed near quantitative conversion to the title compound. Following replacement of H<sub>2</sub> by T<sub>2</sub>, this procedure yielded <sup>3</sup>H-A1443.

## References

- (1) Takeshi, M.; Furukawa, Y.; Iwasa, M.; Komoda, M. EP Patent 2151437, 2010.
- (2) Kousaka, H.; Fukuya, S.; Moriyama, Y.; Yaosaka, M.; Mizukoshi, T. EP Patent 2308857, 2011.
- (3) Renold, P.; Zambach, W.; Maienfisch, P.; Muehlebach, M. WO. Patent 2009080250, 2009.

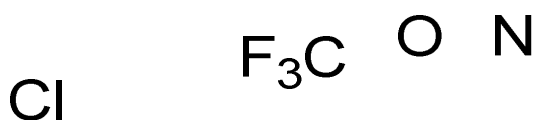

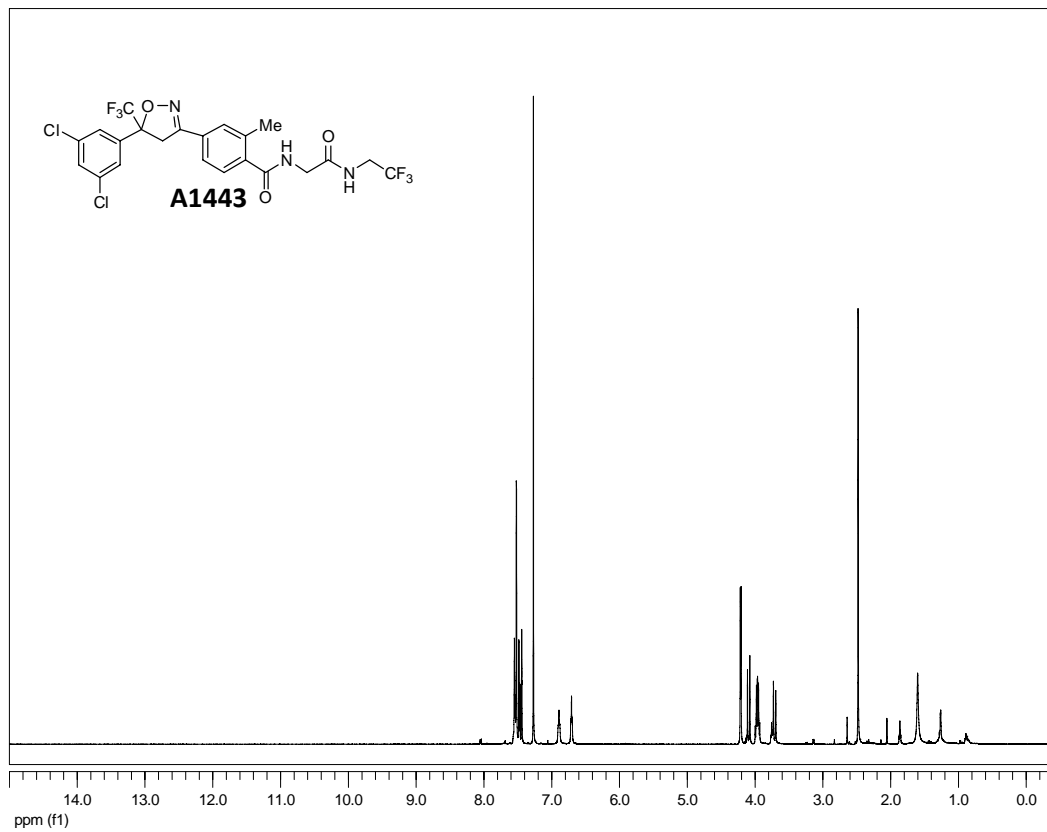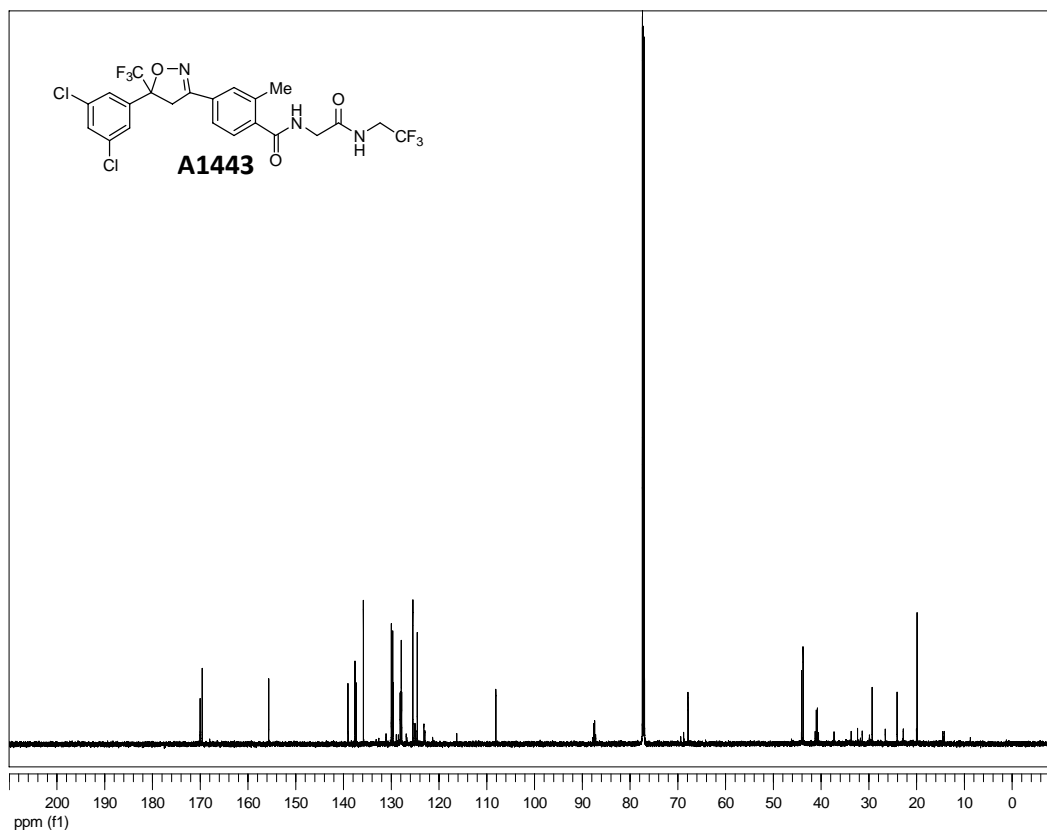

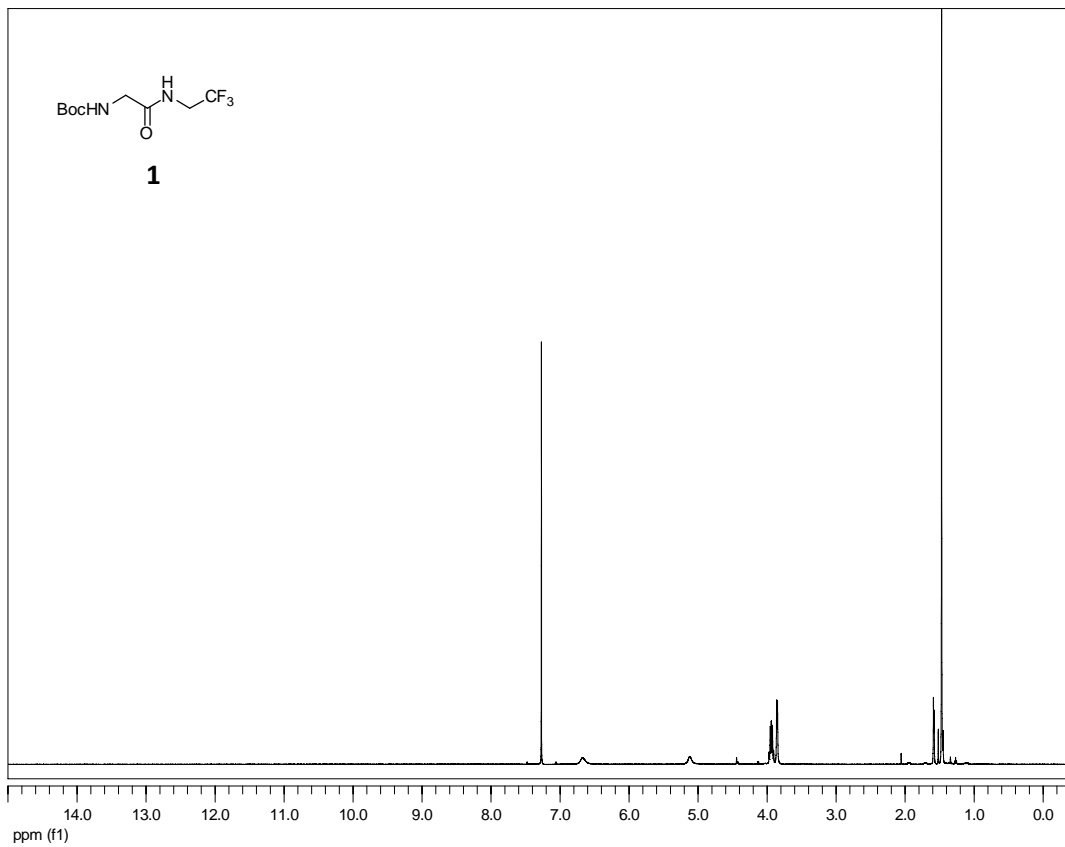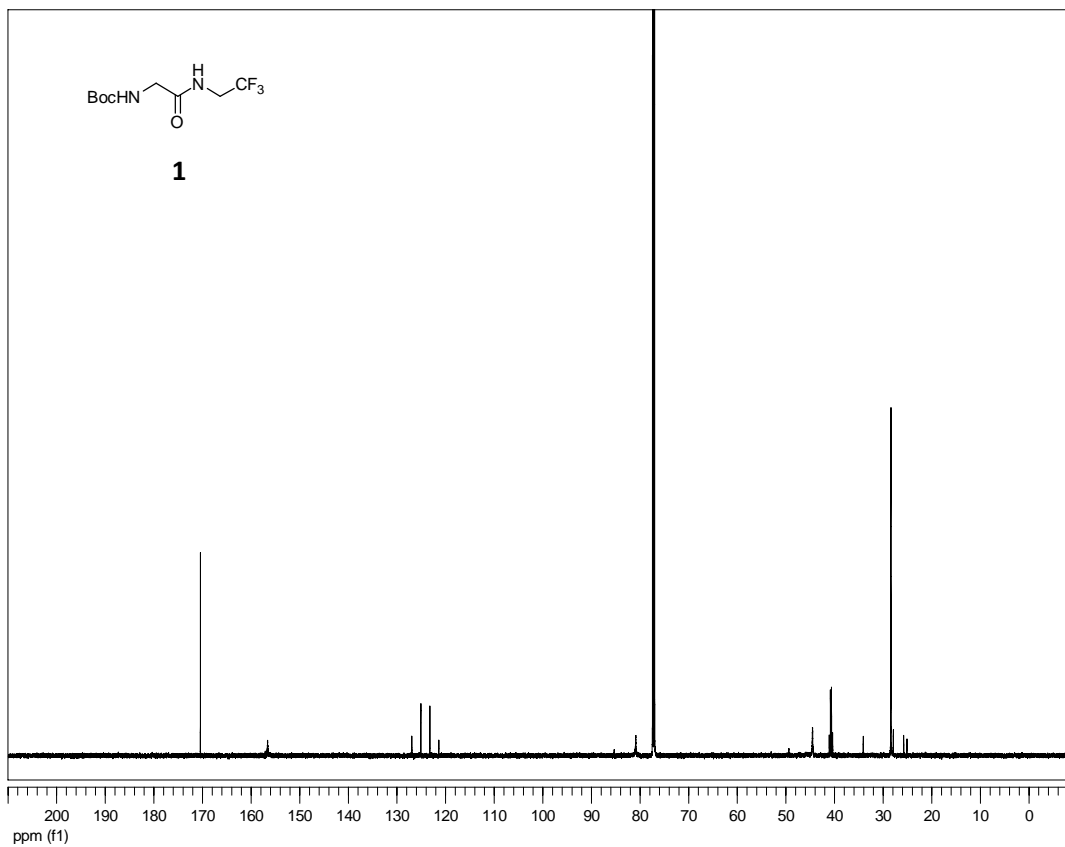

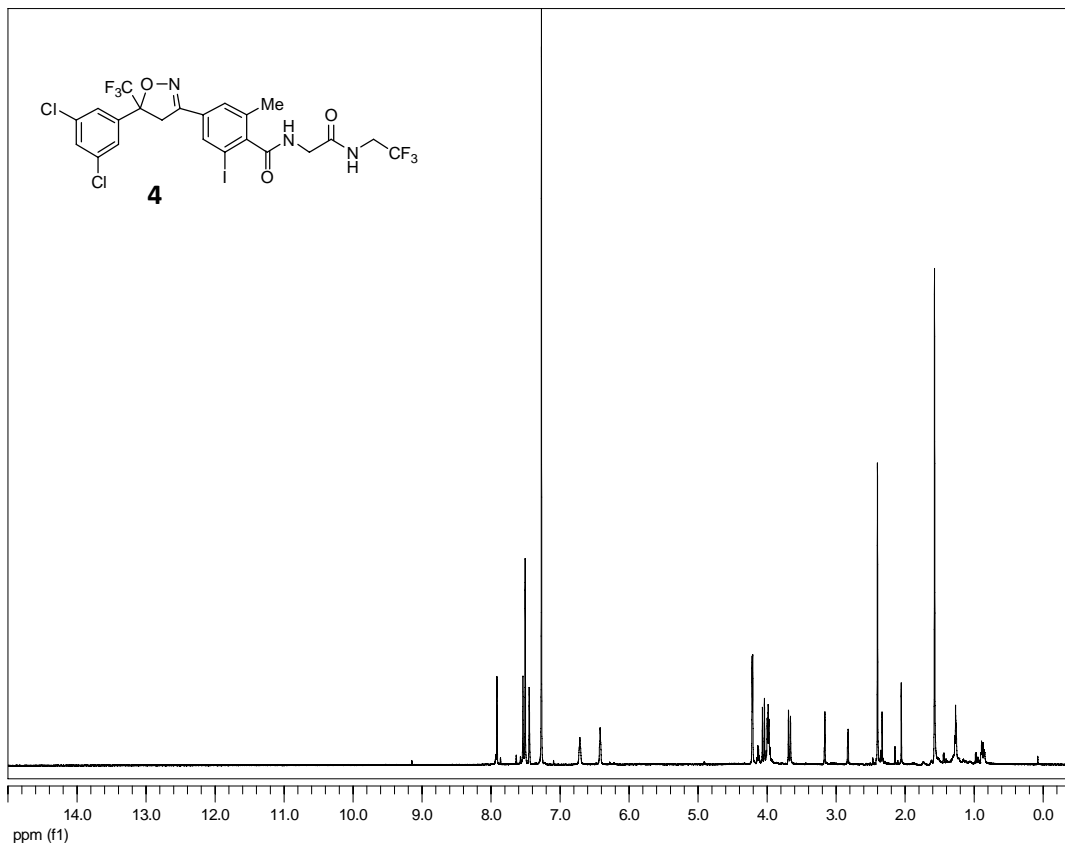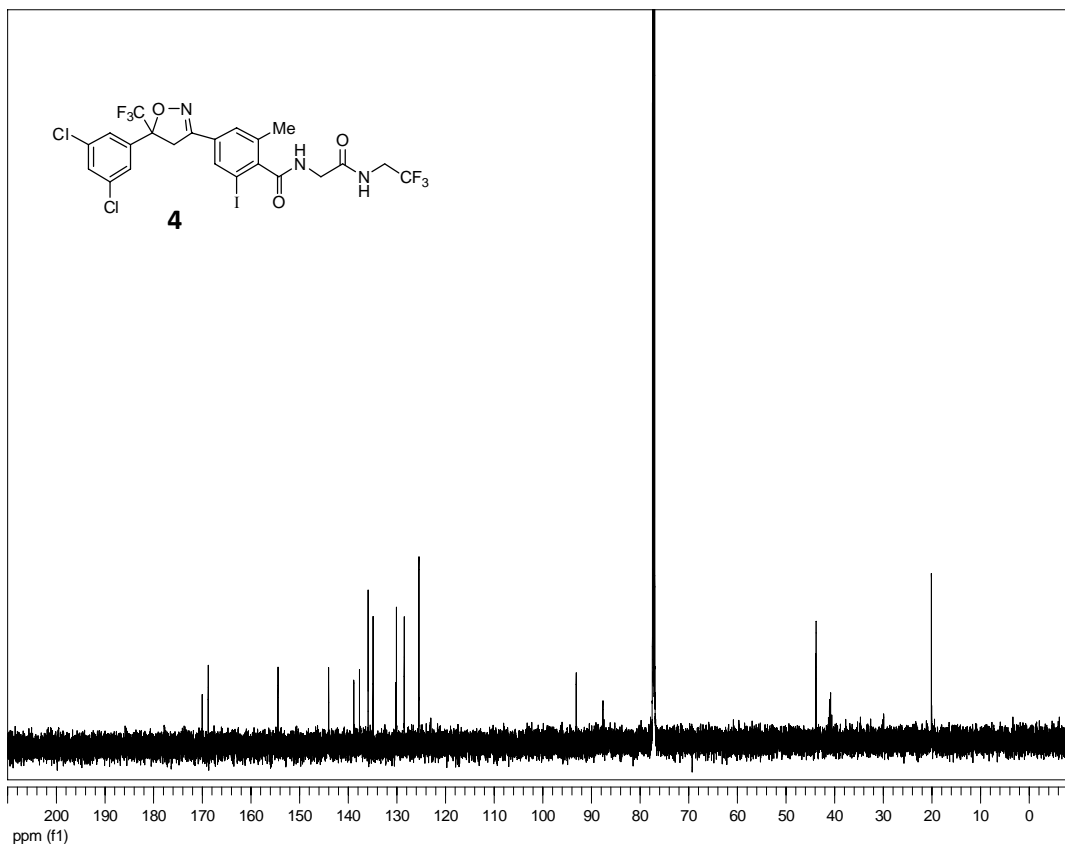

## Technical Data Sheet

VT 100

PG3-014B, [<sup>3</sup>H]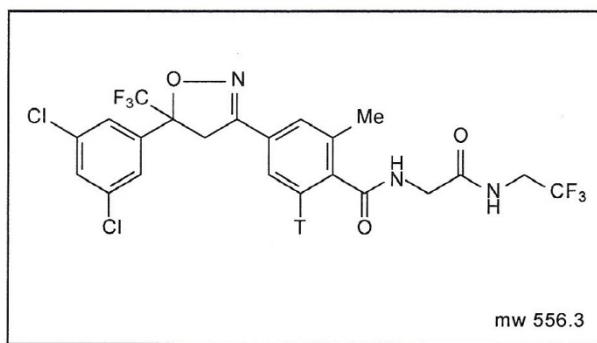

**Lot Number:** 149-033-000

**Specific Activity:** 14 Ci/mmol by Mass Spec.

**Packaged:** 8.2 mCi @ 1 mCi/mL in Ethanol

**Primary Container:** Type A20

**Total Batch Activity:** 8.2 mCi  
**Reserve:** 0 mCi

**Radiochemical Purity:** >99% by HPLC on 3/22/2012

**Comments:** Product identity confirmed by HPLC co-elution with Authentic Standard

**Stability and Storage Recommendation:** The exact rate of decomposition is unknown. However, it can be assumed that the product may decompose at a rate of approximately 2% per month when stored at -20°C in the original container.

**Caution:** This product is intended for investigational or manufacturing use only. It is pharmaceutically unrefined and is not intended for use in humans. Responsibility for its use in humans, as a diagnostic reagent, and compliance with federal laws rests solely with the purchaser.

**Document Issue Date:** March 22, 2012

**Approved By:**

**HPLC**

Prevail C18, 5µm, 4.6 x 150mm  
Mobile Phase A: 0.05% TFA/H<sub>2</sub>O  
Mobile Phase B: CH<sub>3</sub>CN  
Flow Rate: 1.0 mL / min., RC Flow Det.  
time program  
0 min 60%B  
10 min 90%B  
12 min 60%B

RC Profile attached

**TLC**

N/A

## ViTrax

PG3-014B, [3H]  
Cat# VT 100  
Lot# 149-033-000  
Mar 22, 2012

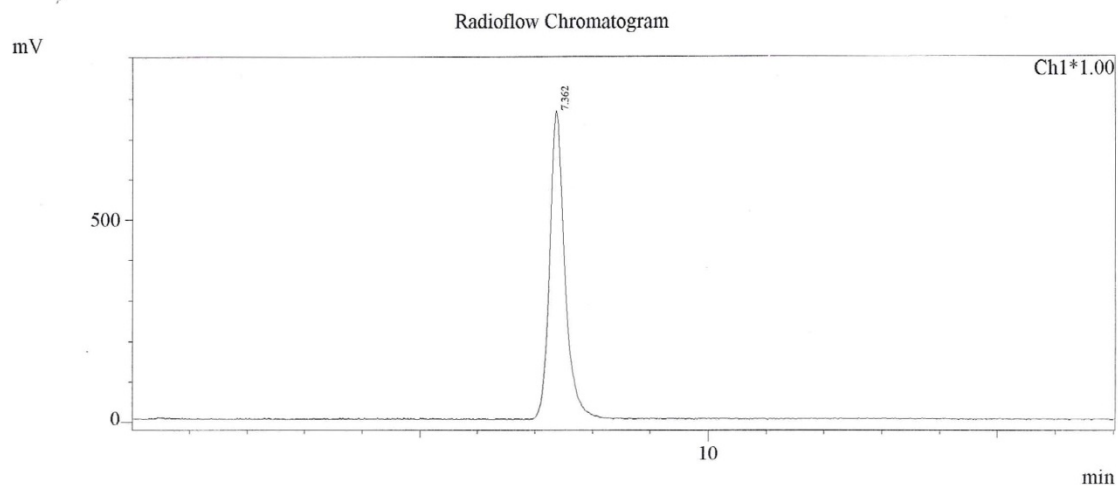

LC Peak Table - Ch1

| Peak# | R.Time | I.Time | F.Time | Area     | Area%  |
|-------|--------|--------|--------|----------|--------|
| 1     | 7.362  | 6.900  | 8.275  | 13971272 | 100.00 |
|       |        |        |        | 13971272 | 100.00 |
